# Supplementary material for: Adjuvant Treatments of Adult Melanoma: A Systematic Review and Network Meta-Analysis
Source: Frontiers journal article supplement (doi:10.3389/fonc.2022.926242), 2022-06-17
Supplement: Data_Sheet_1.PDF [file Data_Sheet_1.PDF]

|                   |                   |                   |                   |                   |                   |                   |                   |
|-------------------|-------------------|-------------------|-------------------|-------------------|-------------------|-------------------|-------------------|
| DTIC              | 1.11 (0.81, 1.52) | 0.73 (0.57, 0.93) | 0.72 (0.6, 0.86)  | 0.76 (0.56, 1.03) | 0.47 (0.38, 0.58) | 0.39 (0.3, 0.5)   | 0.54 (0.32, 0.92) |
| 0.9 (0.66, 1.23)  | gp100             | 0.66 (0.54, 0.8)  | 0.65 (0.46, 0.91) | 0.68 (0.57, 0.82) | 0.42 (0.33, 0.55) | 0.35 (0.27, 0.45) | 0.49 (0.26, 0.9)  |
| 1.37 (1.07, 1.74) | 1.52 (1.24, 1.87) | IPI               | 0.99 (0.75, 1.3)  | 1.04 (0.86, 1.25) | 0.65 (0.55, 0.75) | 0.53 (0.45, 0.62) | 0.74 (0.42, 1.33) |
| 1.39 (1.16, 1.66) | 1.54 (1.1, 2.16)  | 1.02 (0.77, 1.33) | IPIandDTIC        | 1.05 (0.75, 1.46) | 0.65 (0.51, 0.84) | 0.54 (0.4, 0.72)  | 0.75 (0.43, 1.31) |
| 1.32 (0.97, 1.79) | 1.47 (1.22, 1.76) | 0.96 (0.8, 1.16)  | 0.95 (0.68, 1.32) | IPIandgp100       | 0.62 (0.49, 0.79) | 0.51 (0.4, 0.65)  | 0.71 (0.39, 1.32) |
| 2.12 (1.72, 2.61) | 2.36 (1.83, 3.04) | 1.55 (1.33, 1.81) | 1.53 (1.19, 1.97) | 1.61 (1.26, 2.05) | NIVO              | 0.82 (0.69, 0.97) | 1.15 (0.65, 2.03) |
| 2.58 (2, 3.36)    | 2.87 (2.22, 3.72) | 1.89 (1.61, 2.23) | 1.86 (1.39, 2.5)  | 1.96 (1.53, 2.51) | 1.22 (1.03, 1.44) | NIVOandIPI        | 1.4 (0.78, 2.52)  |
| 1.85 (1.09, 3.13) | 2.06 (1.11, 3.8)  | 1.35 (0.75, 2.41) | 1.33 (0.76, 2.33) | 1.4 (0.76, 2.58)  | 0.87 (0.49, 1.53) | 0.72 (0.4, 1.28)  | TRAM              |

Figure S1 Head-to-head comparisons for OS in NMA
