# Supplementary material for: Adjuvant Treatments of Adult Melanoma: A Systematic Review and Network Meta-Analysis
Source: Frontiers journal article supplement (doi:10.3389/fonc.2022.926242), 2022-06-17
Supplement: Data_Sheet_2.PDF [file Data_Sheet_2.PDF]

|                   |                   |                   |                   |                   |                   |                   |                   |
|-------------------|-------------------|-------------------|-------------------|-------------------|-------------------|-------------------|-------------------|
| DTIC              | 1.22 (0.85, 1.75) | 0.76 (0.57, 1.01) | 0.72 (0.59, 0.87) | 1.02 (0.71, 1.46) | 0.4 (0.31, 0.51)  | 0.32 (0.24, 0.42) | 0.45 (0.33, 0.62) |
| 0.82 (0.57, 1.18) | gp100             | 0.62 (0.5, 0.76)  | 0.59 (0.39, 0.89) | 0.84 (0.68, 1.03) | 0.33 (0.25, 0.43) | 0.26 (0.2, 0.33)  | 0.37 (0.23, 0.6)  |
| 1.32 (0.99, 1.77) | 1.61 (1.31, 1.99) | IPI               | 0.95 (0.67, 1.35) | 1.35 (1.1, 1.66)  | 0.53 (0.45, 0.62) | 0.42 (0.36, 0.48) | 0.6 (0.39, 0.92)  |
| 1.39 (1.15, 1.68) | 1.69 (1.12, 2.55) | 1.05 (0.74, 1.49) | IPlandDTIC        | 1.42 (0.95, 2.13) | 0.56 (0.41, 0.76) | 0.44 (0.31, 0.62) | 0.63 (0.43, 0.91) |
| 0.98 (0.68, 1.4)  | 1.19 (0.97, 1.47) | 0.74 (0.6, 0.91)  | 0.71 (0.47, 1.06) | IPlandgp100       | 0.39 (0.3, 0.51)  | 0.31 (0.24, 0.4)  | 0.44 (0.27, 0.71) |
| 2.5 (1.95, 3.2)   | 3.05 (2.35, 3.96) | 1.89 (1.62, 2.2)  | 1.8 (1.32, 2.46)  | 2.55 (1.97, 3.31) | NIVO              | 0.79 (0.67, 0.92) | 1.13 (0.75, 1.69) |
| 3.17 (2.37, 4.24) | 3.87 (2.99, 5.01) | 2.4 (2.07, 2.78)  | 2.29 (1.61, 3.23) | 3.24 (2.51, 4.18) | 1.27 (1.08, 1.48) | NIVOandIPI        | 1.43 (0.93, 2.21) |
| 2.22 (1.61, 3.06) | 2.71 (1.67, 4.39) | 1.68 (1.09, 2.59) | 1.6 (1.1, 2.33)   | 2.27 (1.4, 3.67)  | 0.89 (0.59, 1.33) | 0.7 (0.45, 1.08)  | TRAM              |

**Figure S2** Head-to-head comparisons for PFS in NMA
