# Supplementary material for: Adjuvant Treatments of Adult Melanoma: A Systematic Review and Network Meta-Analysis
Source: Frontiers journal article supplement (doi:10.3389/fonc.2022.926242), 2022-06-17
Supplement: Data_Sheet_3.PDF [file Data_Sheet_3.PDF]

|                   |                   |                   |                   |                   |                   |                   |                   |
|-------------------|-------------------|-------------------|-------------------|-------------------|-------------------|-------------------|-------------------|
| DTIC              | 1.28 (0.61, 2.68) | 1.22 (0.7, 2.14)  | 3.33 (2.33, 4.8)  | 1.21 (0.61, 2.41) | 0.93 (0.58, 1.5)  | 4.52 (2.57, 7.99) | 2.89 (1.49, 5.86) |
| 0.78 (0.37, 1.64) | gp100             | 0.96 (0.59, 1.55) | 2.61 (1.19, 5.8)  | 0.94 (0.64, 1.41) | 0.72 (0.4, 1.31)  | 3.53 (1.99, 6.28) | 2.26 (0.83, 6.36) |
| 0.82 (0.47, 1.42) | 1.05 (0.64, 1.69) | IPI               | 2.73 (1.46, 5.1)  | 0.99 (0.66, 1.47) | 0.76 (0.54, 1.07) | 3.7 (2.74, 5.04)  | 2.37 (1, 5.82)    |
| 0.3 (0.21, 0.43)  | 0.38 (0.17, 0.84) | 0.37 (0.2, 0.69)  | IPlandDTIC        | 0.36 (0.17, 0.76) | 0.28 (0.16, 0.49) | 1.36 (0.72, 2.57) | 0.87 (0.41, 1.91) |
| 0.83 (0.41, 1.63) | 1.06 (0.71, 1.57) | 1.01 (0.68, 1.51) | 2.76 (1.31, 5.84) | IPlandgp100       | 0.77 (0.45, 1.3)  | 3.74 (2.26, 6.19) | 2.4 (0.91, 6.42)  |
| 1.08 (0.67, 1.73) | 1.38 (0.76, 2.49) | 1.32 (0.94, 1.85) | 3.59 (2.03, 6.34) | 1.3 (0.77, 2.21)  | NIVO              | 4.86 (3.49, 6.85) | 3.11 (1.37, 7.31) |
| 0.22 (0.13, 0.39) | 0.28 (0.16, 0.5)  | 0.27 (0.2, 0.37)  | 0.74 (0.39, 1.4)  | 0.27 (0.16, 0.44) | 0.21 (0.15, 0.29) | NIVOandIPI        | 0.64 (0.27, 1.58) |
| 0.35 (0.17, 0.67) | 0.44 (0.16, 1.21) | 0.42 (0.17, 1)    | 1.15 (0.52, 2.45) | 0.42 (0.16, 1.1)  | 0.32 (0.14, 0.73) | 1.56 (0.63, 3.76) | TRAM              |

Figure S3 Head-to-head comparisons for AEs in NMA
